# Supplementary material for: Synthesis and in vitro properties of iron oxide nanoparticles grafted with brushed phosphorylcholine and polyethylene glycol
Source: Royal Society of Chemistry journal article supplement (doi:10.1039/c5py02024g), 2016-01-01
Supplement: c5py02024g1.pdf [file c5py02024g1.pdf]

## Supporting Information

# Synthesis and *In Vitro* Properties of Iron Oxide Nanoparticles Grafted with Brushed Phosphorylcholine and Polyethylene Glycol

*Thomas Blin,<sup>a</sup> Aleksandr Kakinen,<sup>a,b</sup> Emily H. Pilkington,<sup>a</sup> Angela Ivask,<sup>c</sup> Feng Ding,<sup>d</sup> John F. Quinn,<sup>a</sup> Michael R. Whittaker,<sup>a</sup> Pu Chun Ke<sup>a\*</sup> and Thomas P. Davis<sup>a,e\*</sup>*

<sup>a</sup>ARC Centre of Excellence in Convergent Bio-Nano Science and Technology, Monash Institute of Pharmaceutical Sciences, Monash University, 381 Royal Parade, Parkville, VIC 3052, Australia

<sup>b</sup>Laboratory of Environmental Toxicology, National Institute of Chemical Physics and Biophysics, Akadeemia tee 23, Tallinn 12618, Estonia

<sup>c</sup>Future Industries Institute, University of South Australia, Mawson Lakes, SA 5095, Australia

<sup>d</sup>Department of Physics and Astronomy, Clemson University, Clemson, SC 29634, USA

<sup>e</sup>Department of Chemistry, University of Warwick, Gibbet Hill, Coventry, CV4 7AL, United Kingdom

\* Address correspondence to:

Thomas P. Davis: [thomas.p.davis@monash.edu](mailto:thomas.p.davis@monash.edu); Pu Chun Ke: [pu-chun.ke@monash.edu](mailto:pu-chun.ke@monash.edu)

Keywords: phosphorylcholine brushes · polyethylene glycol · RAFT synthesis · suspendability · biocompatibility · cell uptake · iron oxide nanoparticles

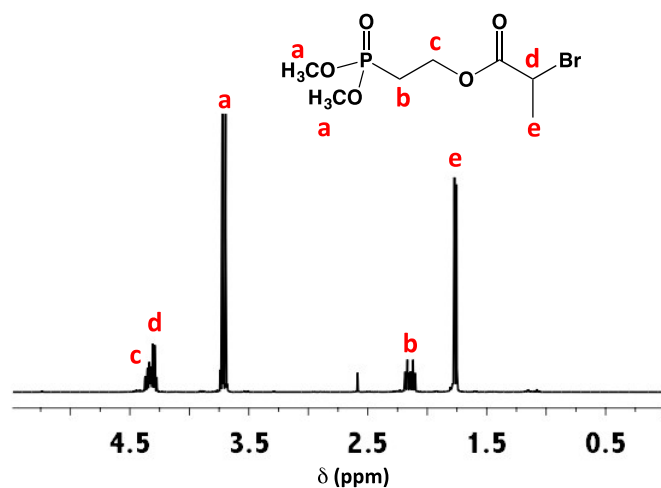

**Figure S1.**  $^1\text{H}$  NMR spectrum of 2-(2-bromopropionyloxy)ethyl phosphonate in  $\text{CDCl}_3$ .

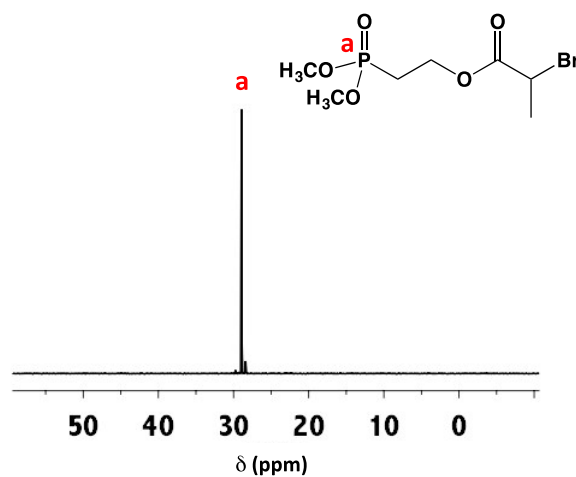

**Figure S2.**  $^{31}\text{P}$  NMR spectrum of 2-(2-bromopropionyloxy)ethyl phosphonate in  $\text{CDCl}_3$ .

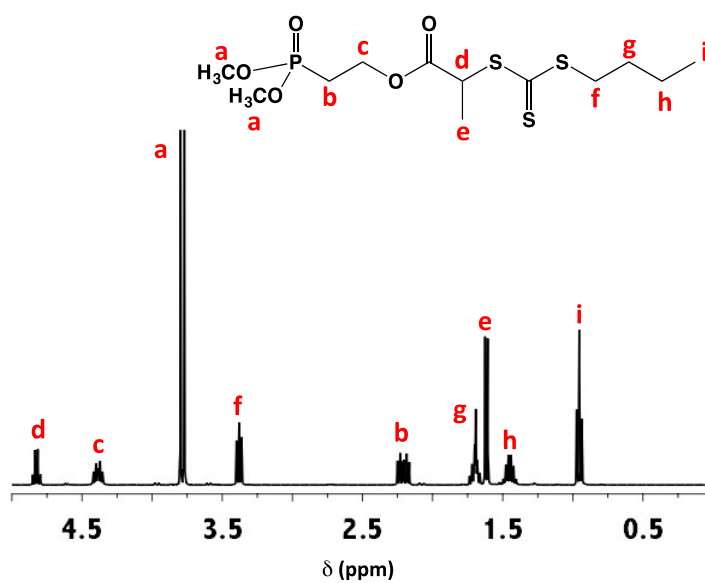

**Figure S3.**  $^1\text{H}$  NMR spectrum of 2-(*n*-butyltrithiocarbonate)-propionic acid 2-(dimethoxyphosphonyl)-ethyl ester (**RA1**) in  $\text{CDCl}_3$ .

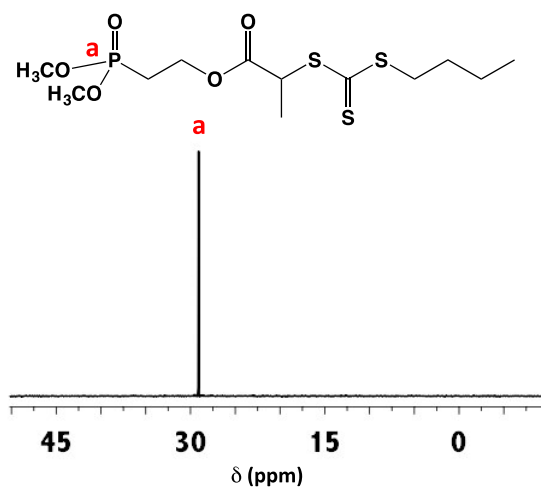

**Figure S4.**  $^{31}\text{P}$  NMR spectrum of 2-(*n*-butyltrithiocarbonate)-propionic acid 2-(dimethoxyphosphonyl)-ethyl ester (**RA1**) in  $\text{CDCl}_3$ .

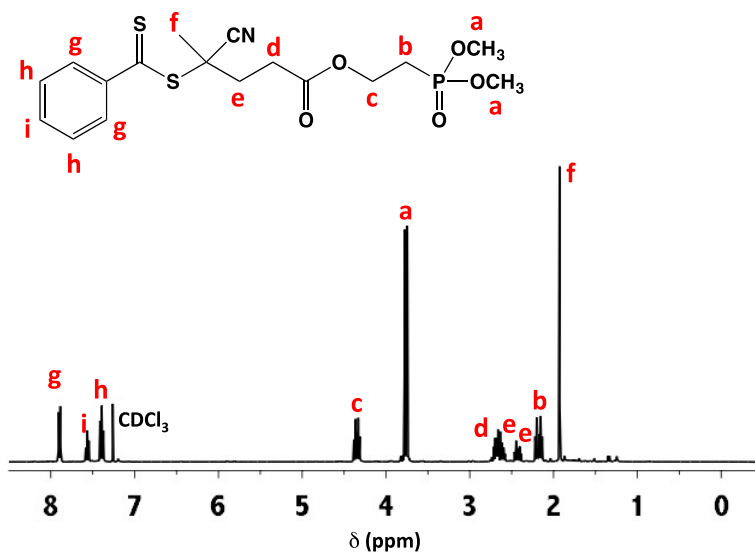

**Figure S5.**  $^1\text{H}$  NMR spectrum of 4-cyano-4-(phenylcarbonothioylthio) pentanoic acid 2-(dimethoxyphosphonyl)-ethyl ester (**RA2**) in  $\text{CDCl}_3$ .

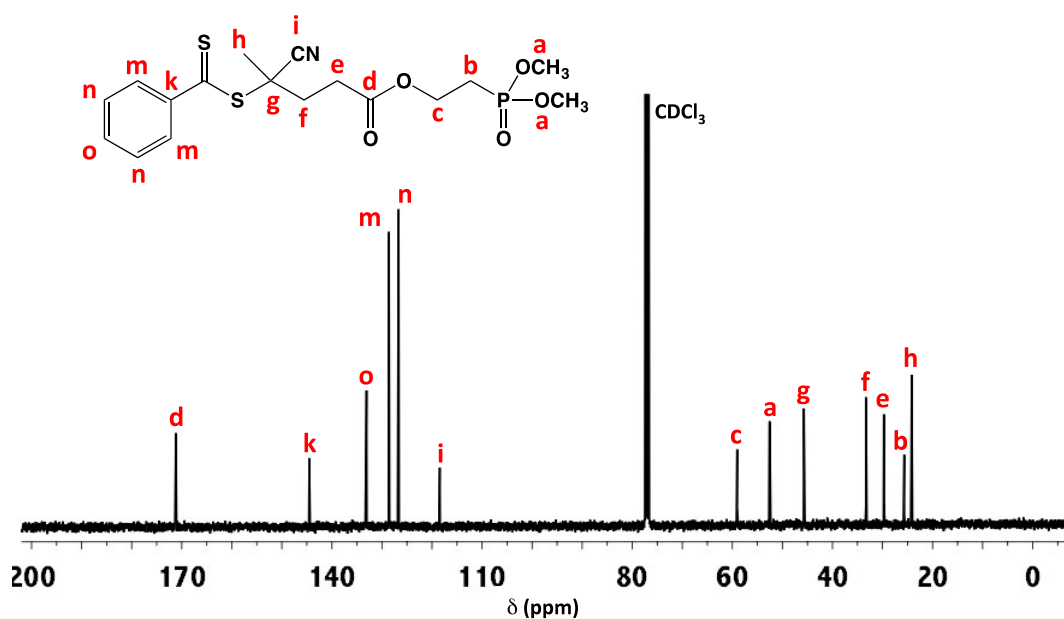

**Figure S6.** <sup>13</sup>C NMR spectrum of 4-cyano-4-(phenylcarbonothioylthio) pentanoic acid 2-(dimethoxyphosphonyl)-ethyl ester (**RA2**) in CDCl<sub>3</sub>.

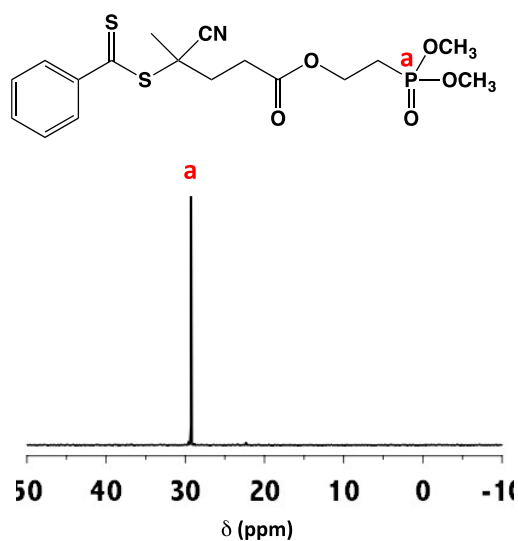

**Figure S7.** <sup>31</sup>P NMR spectrum of 4-cyano-4-(phenylcarbonothioylthio) pentanoic acid 2-(dimethoxyphosphonyl)-ethyl ester (**RA2**) in CDCl<sub>3</sub>.

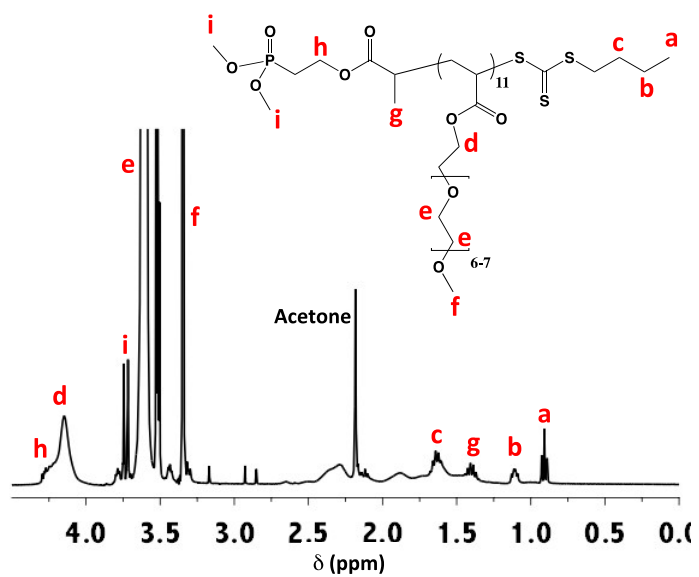

**Figure S8.** <sup>1</sup>H NMR spectrum of protected poly(OEGA) in CDCl<sub>3</sub>.

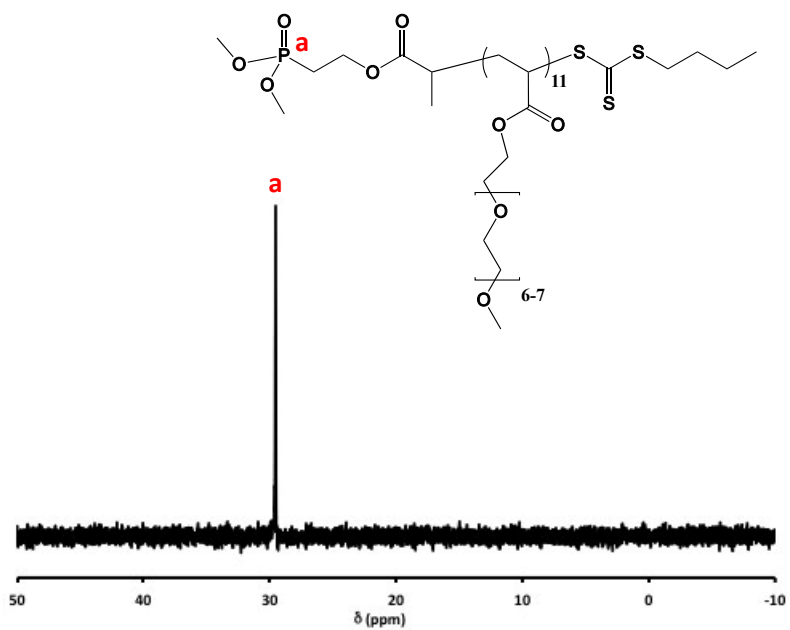

**Figure S9.** <sup>31</sup>P NMR spectrum of protected poly(OEGA) in CDCl<sub>3</sub>.

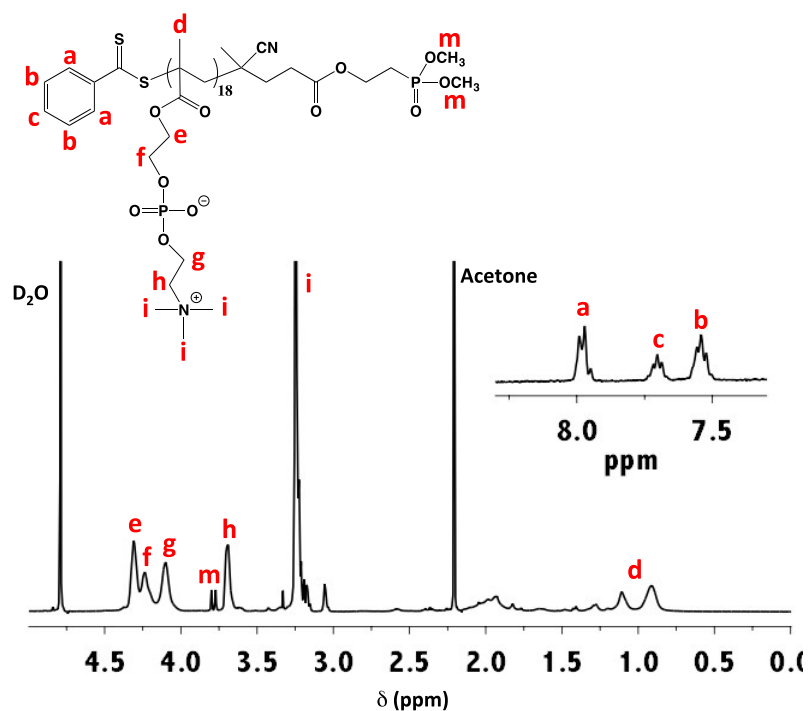

**Figure S10.**  $^1\text{H}$  NMR spectrum of protected poly(MPC) in  $\text{D}_2\text{O}$ . The inset figure is the expanded region, 7.4 – 8.1 ppm, showing the protons of the benzyl end group.

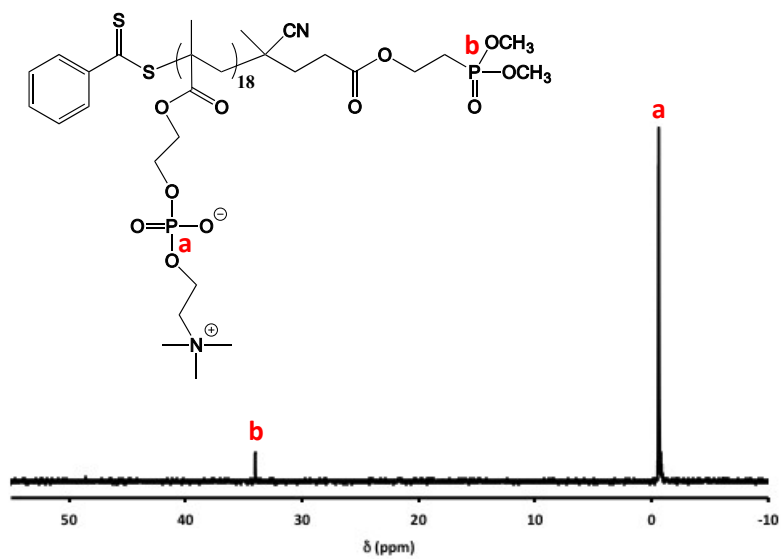

**Figure S11.**  $^{31}\text{P}$  NMR spectrum of protected poly(MPC) in  $\text{D}_2\text{O}$ .
